# Supplementary material
Source: publisher figshare collection journal article supplement (https://acs.figshare.com/ndownloader/files/4769362)
Supplement: Supplementary file 1 [file 4769362]

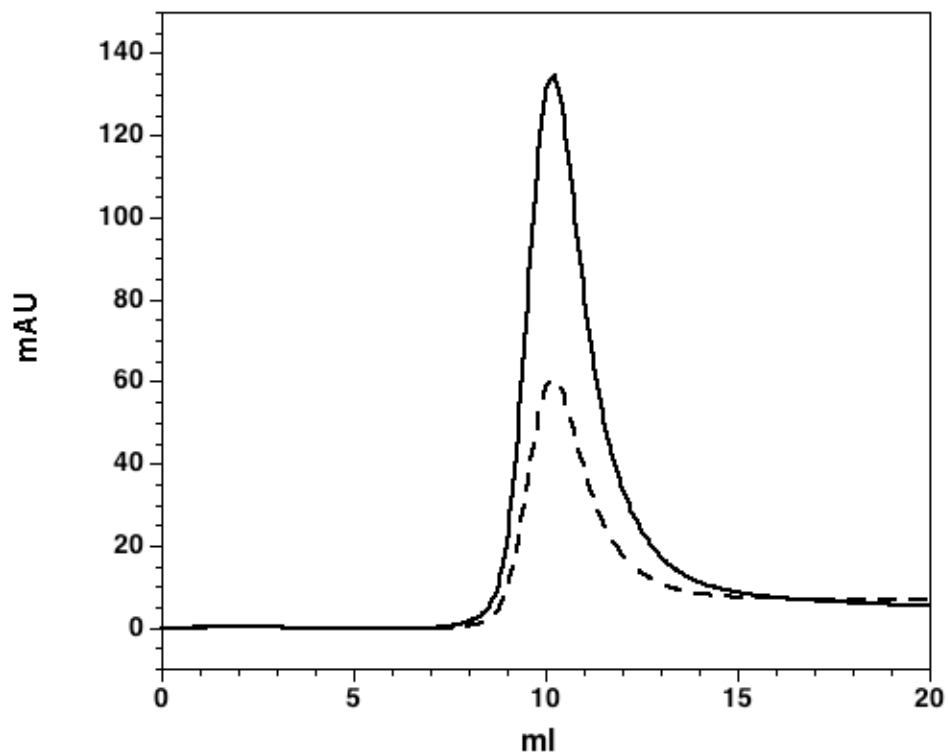

**Supplementary Figure 1:** Gel filtration of PSD-1 on G25 Sephadex. A 0.25 mL sample of a 10 mg/mL solution of PSD-1 in 0.1 M KPO<sub>4</sub>, pH 7.2 was injected onto the column. The protein eluted at the size expected for the monomeric species. Absorbance at 280nm is shown as a solid line. Absorbance at 254 nm is shown as a dashed line.

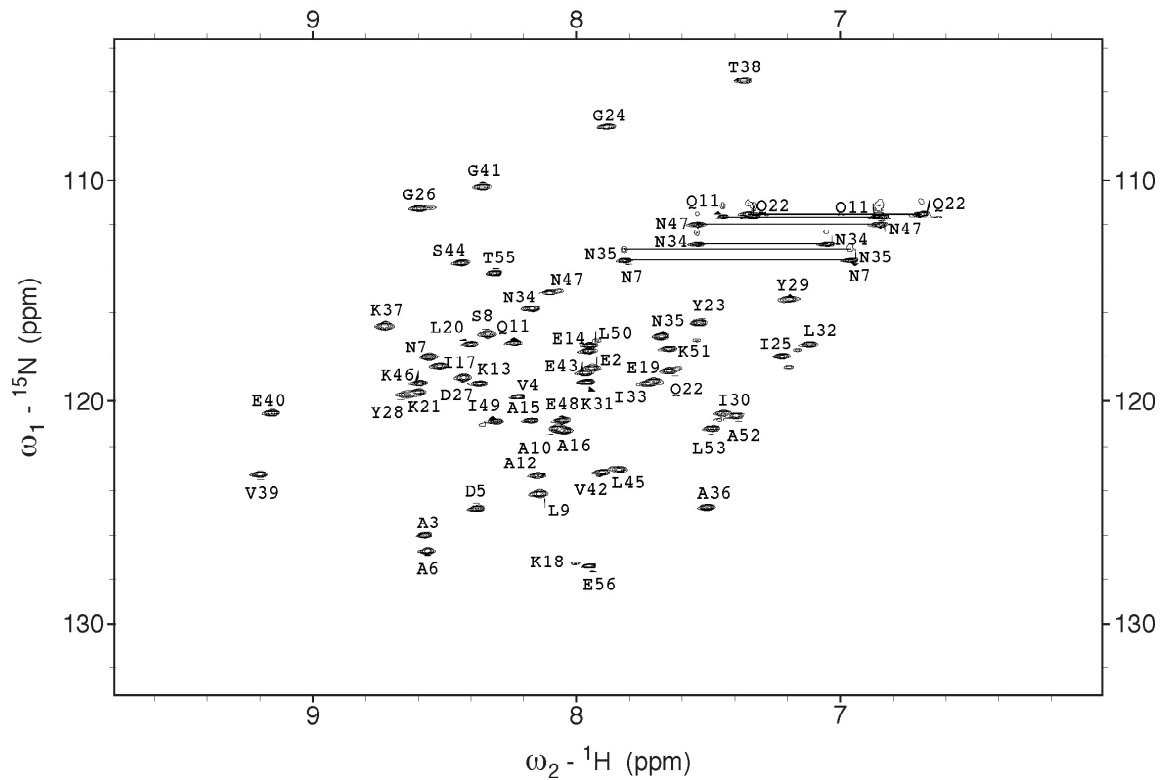

**Supplementary Figure 2:** 500 MHz  ${}^{15}\text{N}$  HSQC spectrum of PSD-1 recorded at 25°C, pH 7. Side chain amide assignments are connected by horizontal lines.

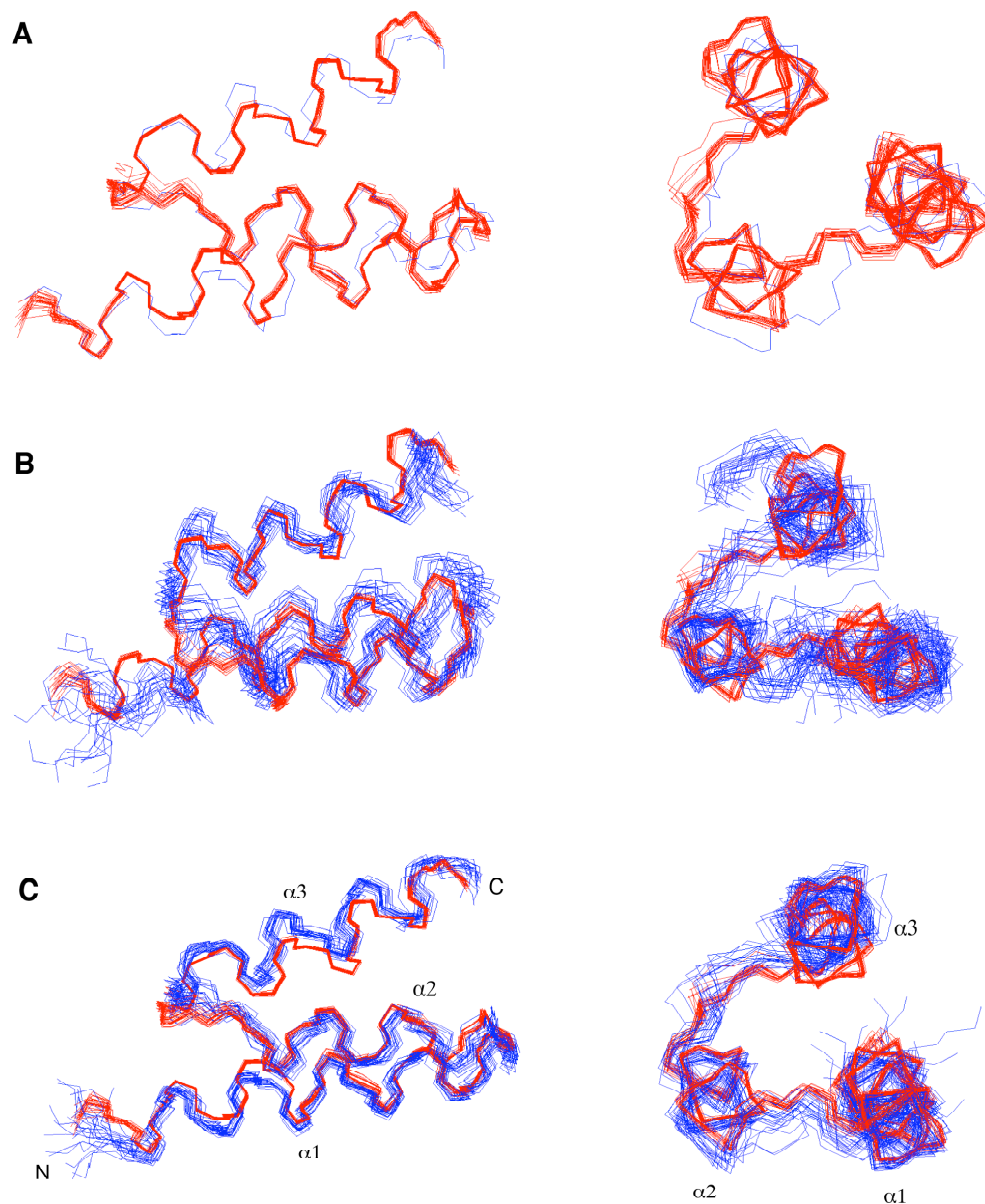

**Supplementary Figure 3:** (A) Overlay of the 20 final PSD-1 structures (red) with ALB8-GA (blue) taken from the crystal structure of the complex with HSA (PDB code 1tf0). Side and top views are in the left and right panels, respectively. (B) Overlay of the PSD-1 ensemble (red) with the ALB8-GA ensemble of 20 NMR structures (blue, PDB code 1prb). (C) Overlay of the PSD-1 (red) and G148-GA3 (blue, PDB code 1gjs) NMR structure ensembles.
